# Supplementary figures and images for: Exploring the Mechanism of 2,4-Dichlorophenoxyacetic Acid in Causing Neurodegenerative Diseases Based on Network Toxicology and Molecular Docking
Source: MDPI journal article supplement (doi:10.3390/ijms262411980), 2025-12-12

**A**

**N  
O  
S  
3**

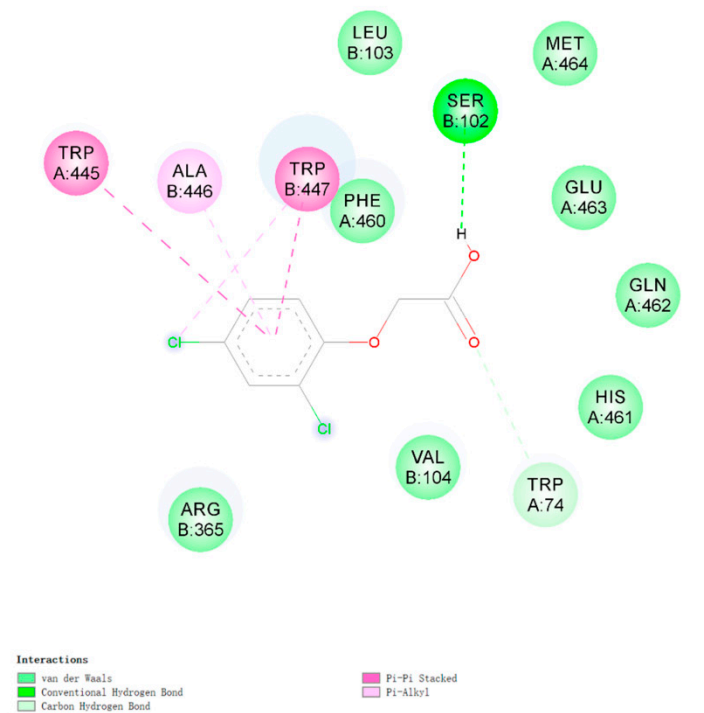

**B**

**N  
F  
K  
B  
1**

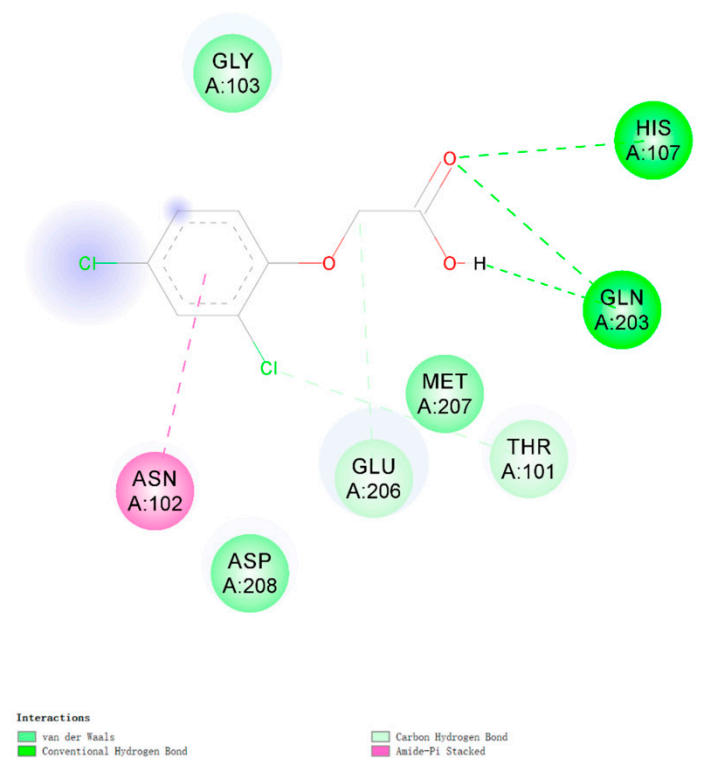

Figure S1:2D molecular docking diagram of NFKB1 and NOS3

Supplement: s1 [file Supplementary Figure.pdf › Supplementary Figure.pdf]
